# Supplementary material for: The design, synthesis and catalytic performance of vanadium-incorporated mesoporous silica with 3D mesoporous structure for propene epoxidation
Source: Royal Society of Chemistry journal article supplement (doi:10.1039/d0ra00349b), 2020-01-01
Supplement: d0ra00349b1.pdf [file d0ra00349b1.pdf]

## Supporting Information

### **Design, synthesis and catalytic performance of vanadium-incorporated mesoporous silica with 3D mesopore structure for propene epoxidation**

Agnieszka Held\*, Ewa Janiszewska\*, Justyna Czerepińska, Jolanta Kowalska-Kuś

*Adam Mickiewicz University, Faculty of Chemistry, Uniwersytetu Poznańskiego 8, 61-614 Poznan, Poland*

**Keywords:** propene, epoxidation, mesoporous vanadosilicates, N<sub>2</sub>O, hydrothermal synthesis

*\*Author to whom correspondence should be addressed*

*E-mail: [awaclaw@amu.edu.pl](mailto:awaclaw@amu.edu.pl) (A. Held), [eszym@amu.edu.pl](mailto:eszym@amu.edu.pl) (E. Janiszewska)*

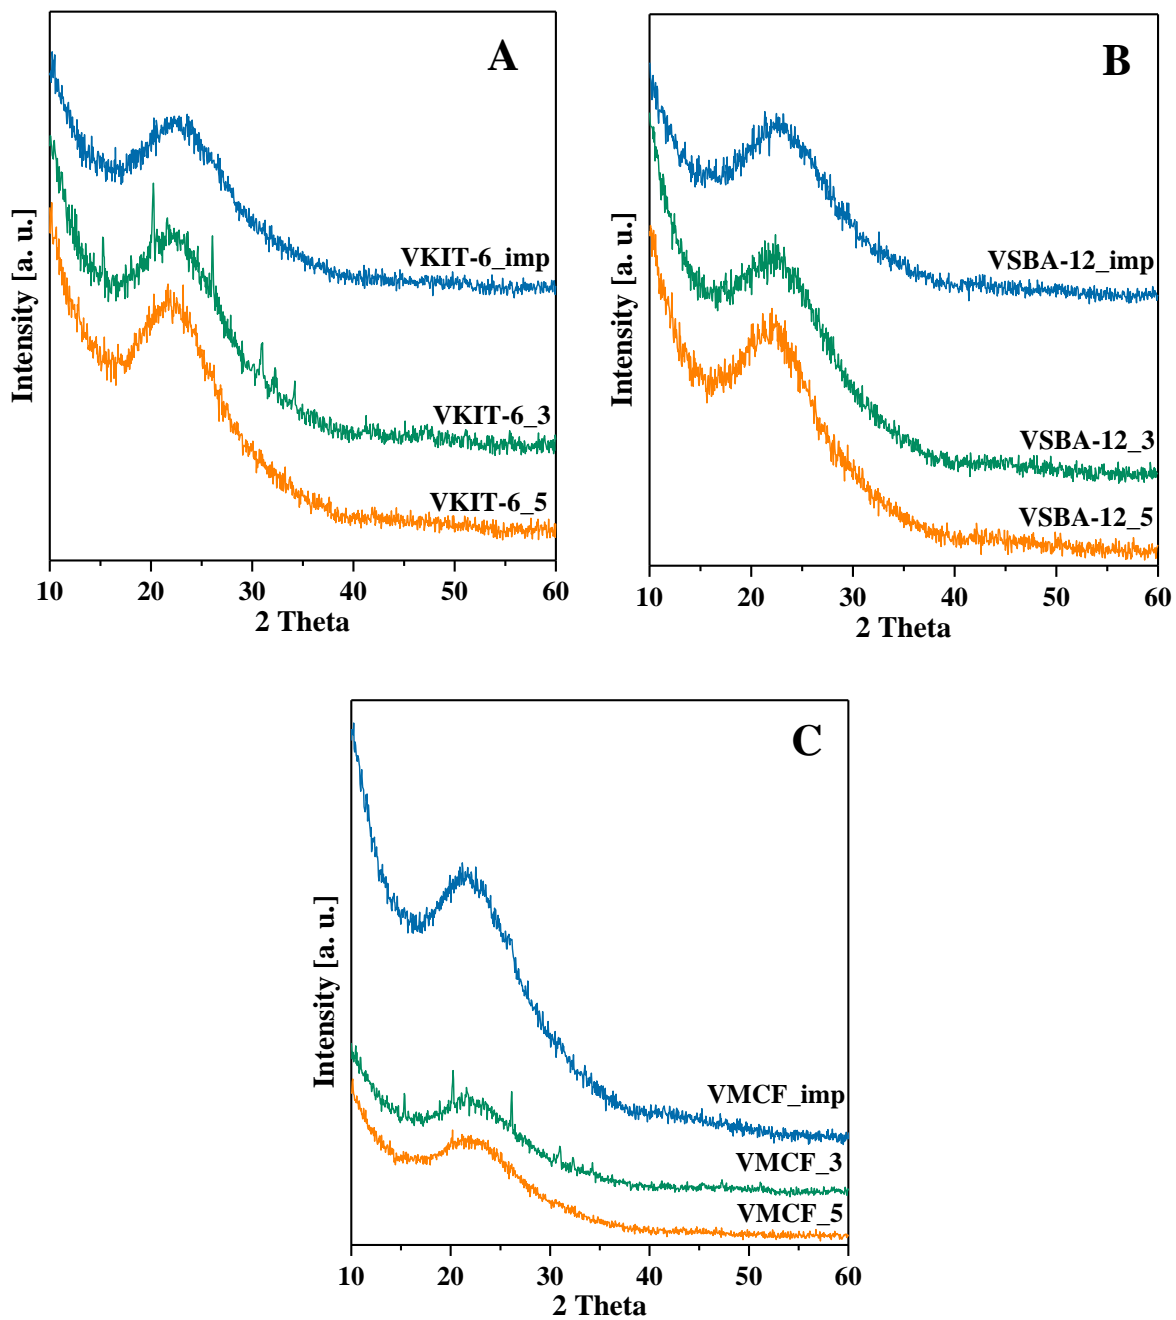

Fig. 15 Wide-angle XRD patterns of V-containing catalysts.

**Table 1S** Results of the UV-vis spectra data for V-containing catalysts.

| Sample      | Distribution of V-species |                               |                                    |        |
|-------------|---------------------------|-------------------------------|------------------------------------|--------|
|             | $V^{\delta+}$ inside wall | $V^{\delta+}$ on wall surface | $V^{\delta+}$ in external clusters |        |
|             | < 250 nm                  | ~250-300 nm                   | [ %]                               |        |
|             | [%]                       | [%]                           | 300 - 350nm                        | >350nm |
| VMCF_3      | 11.5                      | 1.5                           | 65.2                               | 21.8   |
| VMCF_5      | 27.7                      | 32.1                          | 20.2                               | 20.0   |
| VMCF_imp    | 35.9                      | 52.6                          | 0                                  | 11.5   |
| VSBA-12_3   | 45.7                      | 13.5                          | 31.9                               | 8.9    |
| VSBA-12_5   | 40.2                      | 50.8                          | 9.0                                | 0      |
| VSBA-12_imp | 25.2                      | 30.9                          | 0                                  | 43.9   |
| VKIT-6_3    | 25.7                      | 13.2                          | 52.4                               | 8.6    |
| VKIT-6_5    | 24.3                      | 32.7                          | 29.5                               | 13.5   |
| VKIT-6_imp  | 28.8                      | 55.0                          | 0                                  | 16.2   |

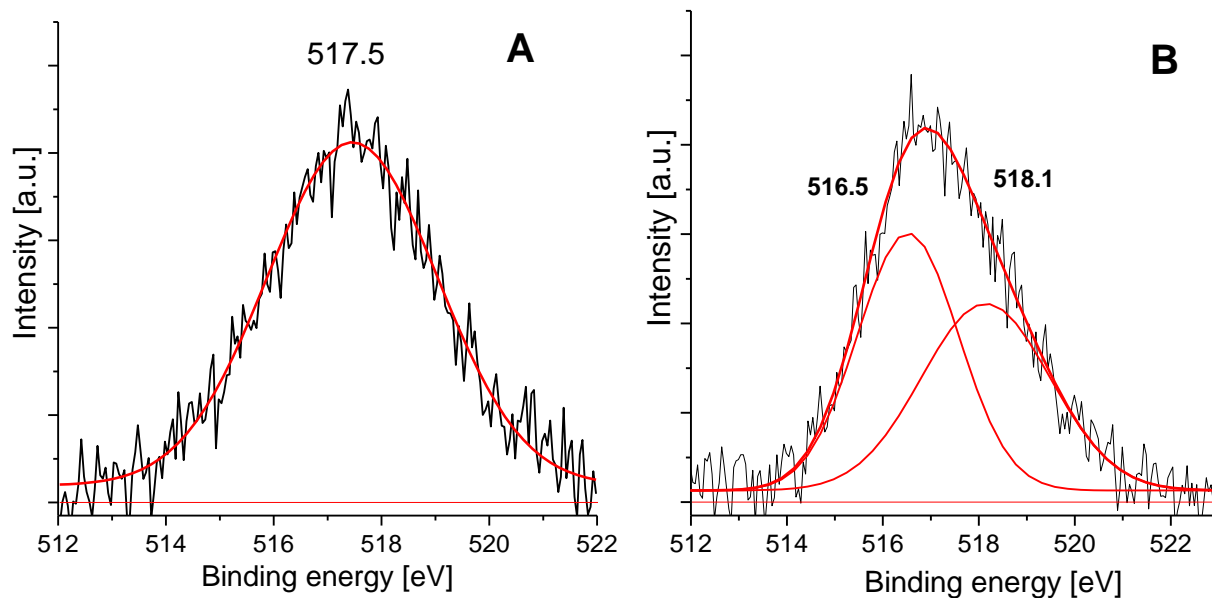

**Fig. 2S** Deconvoluted XPS V 2p<sub>3/2</sub> spectra of the impregnated VMCF\_imp (A) and synthesized VMCF\_3 (B) samples.

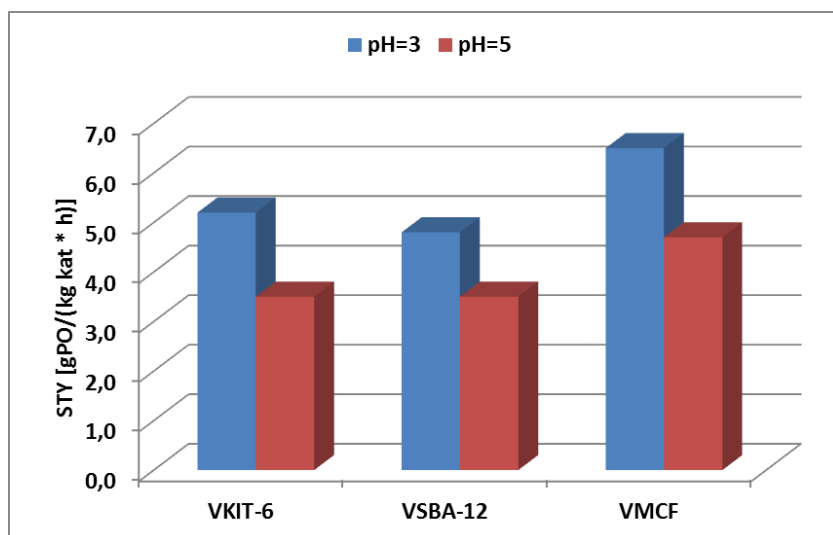

**Fig. 3S** Space time yield (STY) of propene oxide over vanadium modified mesoporous silica synthesized at different pH; reaction temperature 653K.

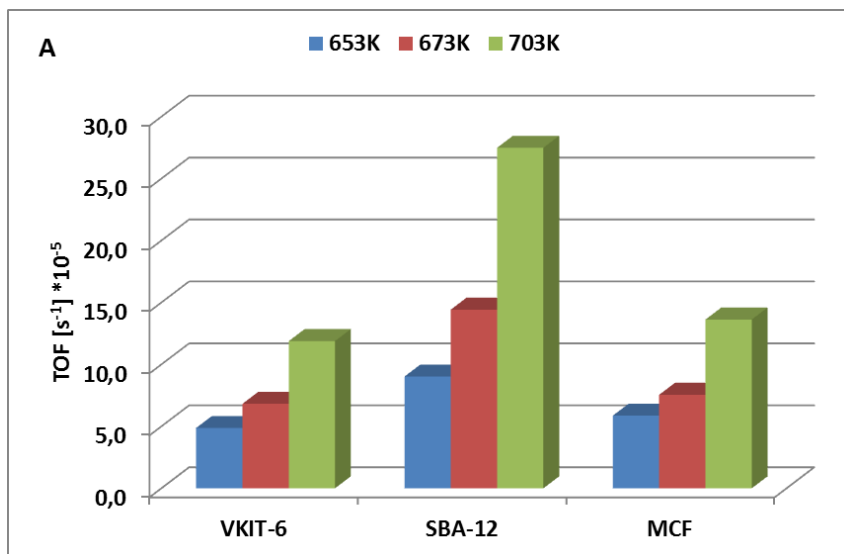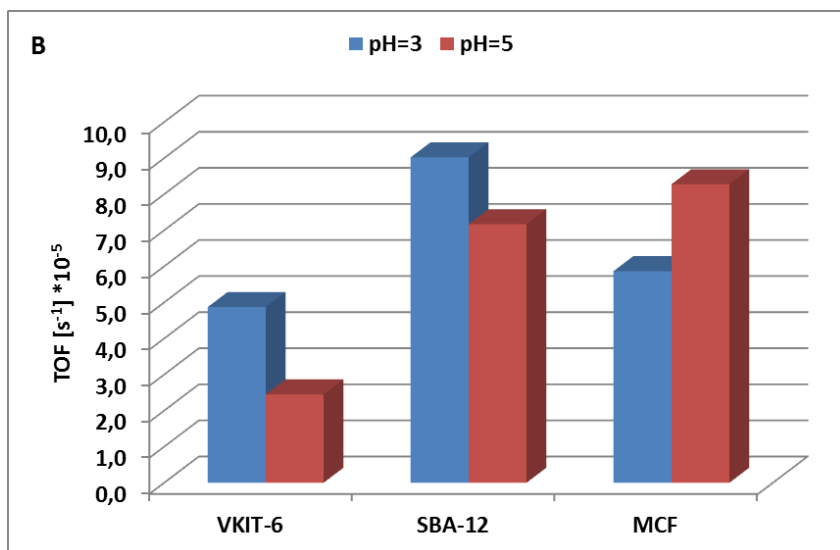

**Fig. 4S** Comparison of specific activity expressed as turnover frequency (TOF) for propene epoxidation towards propene oxide on VKIT-6, VSBA-12, and VMCF: (A) samples synthesized at pH=3; (B) samples synthesized at different pH (reaction temperature 653K).

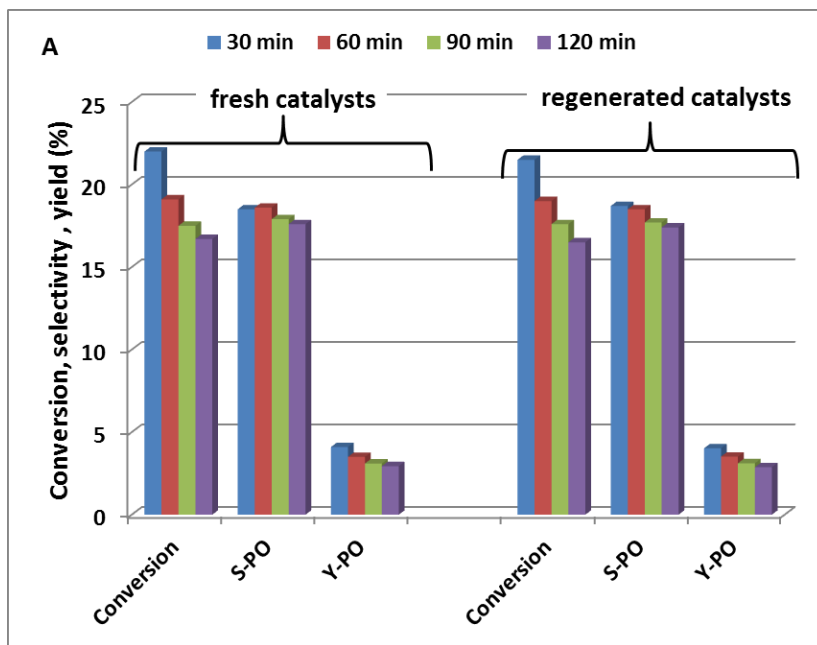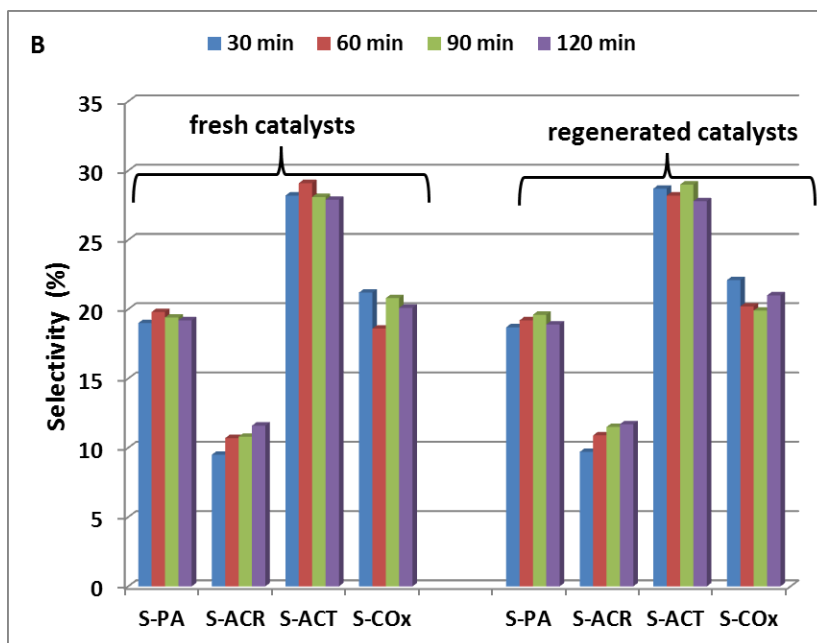

**Fig. 5S** Catalytic activity of fresh and regenerated VKIT-6\_3, tested at 703K within 2 hours, expressed as propene conversion, selectivity to PO, PO yield (A) and selectivity to other oxygen-bearing products (B).

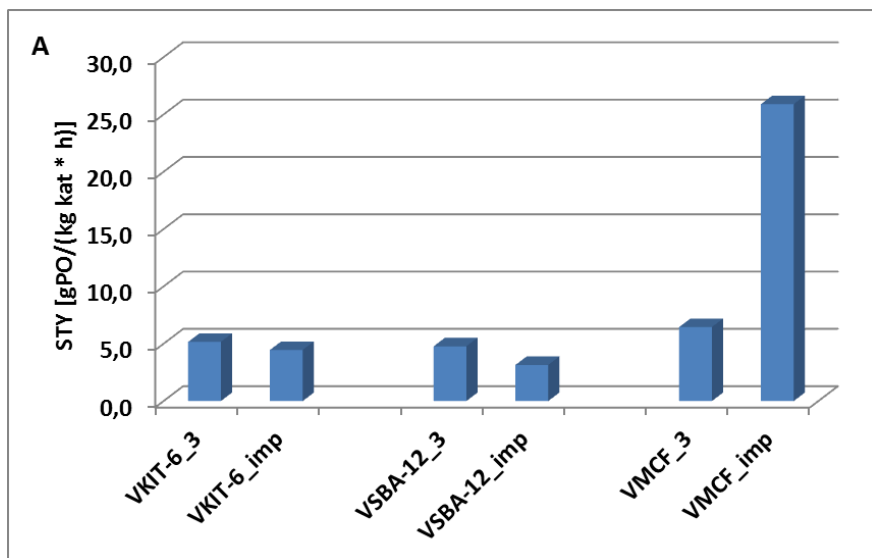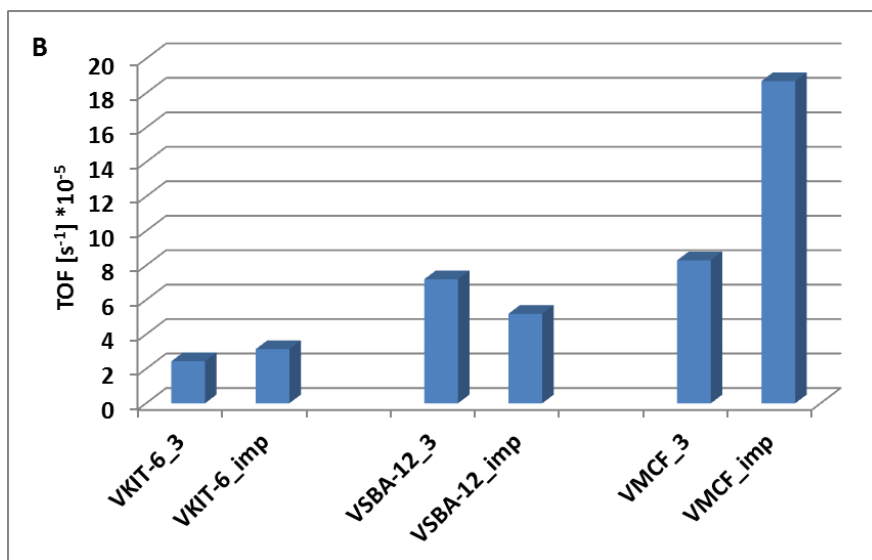

**Fig. 6S** Comparison of catalytic activity of VKIT-6, VSBA-12, and VMCF samples prepared by direct synthesis at pH=3 and by impregnation method expressed as space time yield (STY) of PO (A) and turnover frequency (TOF) (B); reaction temperature 653K
